# Supplementary material
Source: PubMed Central journal article supplement (PMC8047609)
Supplement: JCOPDF-8-007-s001.pdf [file JCOPDF-8-007-s001.pdf]

**Supplemental Table 1. SFS eligibility criteria**

**Inclusion criteria:**

- Males or females age at least 18 years at the time of entry
- Diagnosis of alpha-1 antitrypsin deficiency
- Participant in AlphaNet program because of prescription for alpha-1 antitrypsin augmentation therapy
- Evidence of pulmonary disease with one or more of the following:
  - FEV1 less than 80% predicted and FEV1/FVC less than 0.70
  - Emphysema on a previous CT scan of the chest
  - Receiving augmentation therapy for lung disease
- Accessible by telephone
- Ability and willingness to complete monthly and semi-annual questionnaires by telephone interview
- Ability and willingness to provide informed consent

**Exclusion criteria:**

- Participating in other studies that involve some type of intervention
- Unable or unwilling to perform physical exercise lasting a minimum of 20 minutes, three times a week and that includes exercise of both upper and lower extremities
- Individuals with self-reported coronary or cardiovascular disease or insulin-dependent diabetes whose health could be put at risk by a self-monitored exercise or nutrition program. Such individuals could be enrolled if their personal physician certified in writing their medical suitability.
- Has received a lung transplant or is expecting or planning to receive a lung transplant within two years of study initiation
- Females who are pregnant or expect to become pregnant within three years of study initiation

SFS- Step Forward Study; FEV1- Forced expiratory volume in one second; FVC- Forced vital capacity; CT- Computerized tomography;

**Supplemental Table 2.** Mailings to SFS participants

| <b>Date</b>                        | <b>Materials</b>                                                                                                                                                      | <b>Intervention Group</b> | <b>Standard Care Group</b> |
|------------------------------------|-----------------------------------------------------------------------------------------------------------------------------------------------------------------------|---------------------------|----------------------------|
| 10/2009                            | Exercise guide, pedometers, daily diaries, and breathlessness self-assessment guide                                                                                   | X                         | X                          |
| 10/2009 -<br><b>Intervention 1</b> | Therabands, exercise poster with theraband instructions                                                                                                               | X                         |                            |
| 01/2010                            | Healthy Eating in COPD booklet                                                                                                                                        | X                         | X                          |
| 07/2010                            | Harmonica with instructions for breathing exercise                                                                                                                    | X                         | X                          |
| 07/2010-<br><b>Intervention 2</b>  | Small group diet and nutrition consultations with a registered dietician (individualized by low, normal, high BMI) with follow-up 3 months after initial consultation | X                         |                            |
| 02/2011                            | Water bottle with hydration recommendations                                                                                                                           | X                         | X                          |
| 02/2011-<br><b>Intervention 3</b>  | “Breathing techniques in Alpha-1” video                                                                                                                               | X                         |                            |
| 03/2011                            | SFS Sweepstakes (award drawing for those with best diary adherence)                                                                                                   | X                         | X                          |
| 07/2011-<br><b>Intervention 4</b>  | Exercise physiology and use of supplemental oxygen lecture by teleconference or audio recording                                                                       | X                         |                            |
| 02/2012                            | Alpha-1 Family Cookbook                                                                                                                                               | X                         | X                          |
| 02/2012-<br><b>Intervention 5</b>  | Weight training using soup cans including exercise poster. Exercise ball and poster on its use.                                                                       | X                         |                            |
| 07/2012-<br><b>Intervention 6</b>  | Exercise peddler and instructions.                                                                                                                                    | X                         |                            |
| 04/2013                            | Oximeter with instructions and results table                                                                                                                          | X                         | X                          |
| 04/2013-<br><b>Intervention 7</b>  | “Virtual Pulmonary Rehab” (VPR) including videos, teleconferences, and written materials over 12-week period                                                          | X                         |                            |

Note: Shaded rows represent mailings to the intervention group only; not shaded rows represent paired mailings (mailed to both standard care and intervention group) to maintain blinding

**Supplemental Table 3.** Comparison of baseline characteristics of patients included in analyses to patients excluded due to missing data, n=500

|                                  | <b>Included</b>         | <b>Excluded</b>         | <b>p-value</b> |
|----------------------------------|-------------------------|-------------------------|----------------|
|                                  | <b>N=429</b>            | <b>N=71<sup>a</sup></b> |                |
| <b>Age, years, mean (SD)</b>     | 57.80 (9.24)            | 56.94 (9.03)            | 0.55           |
| <b>Female, n (%)</b>             | 224 (52.21)             | 36 (52.94)              | 0.95           |
| <b>Non-Hispanic White, n (%)</b> | 422 (98.60)             | 67 (98.53)              | 0.82           |
| <b>Married, n (%)</b>            | 311 (73.35)             | 41 (60.30)              | 0.03           |
| <b>ZZ variant, n (%)</b>         | 348 (88.55)             | 53 (89.83)              | 0.29           |
| <b>Smoking history, n (%)</b>    | 315 (75.18)             | 50 (73.5)               | 0.79           |
| <b>Oxygen use, n (%)</b>         | 226 (52.68)             | 32 (45.1)               | 0.23           |
| <b>Body Mass Index, n (%)</b>    | <i>(included n=422)</i> | <i>(excluded n=78)</i>  | 0.89           |
| Low ( $\leq 19$ )                | 19 (4.50)               | 4 (5.13)                |                |
| Normal (20-25)                   | 184 (43.60)             | 33 (42.31)              |                |
| High (>25-30)                    | 140 (33.18)             | 23 (29.49)              |                |
| Very High ( $\geq 30$ )          | 79 (18.72)              | 17 (21.79)              |                |

<sup>a</sup> Note: of the n=71 excluded from the analyses, n=32 were from the intervention group and n=39 from the standard care group;

**Supplemental Figure 1. AlphaNet's Weekly Food and Activity Diary**

**AlphaNet's Weekly Food & Activity Diary**

Name: \_\_\_\_\_

1. Week Starting (date): \_\_\_\_/\_\_\_\_/\_\_\_\_

2. What is your current weight (lbs)? \_\_\_\_\_

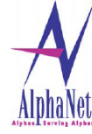

| Day of the Week | Length of Activity Time (Minutes) |          |        | Pedometer Reading* | Breakfast Size                                                   |                                                                  | Lunch Size                                                       |                                                                  | Dinner Size                                                      |                                                                  | Additional Meals** |
|-----------------|-----------------------------------|----------|--------|--------------------|------------------------------------------------------------------|------------------------------------------------------------------|------------------------------------------------------------------|------------------------------------------------------------------|------------------------------------------------------------------|------------------------------------------------------------------|--------------------|
|                 | Warm-Up                           | Strength | Cardio |                    | None                                                             | Small                                                            | None                                                             | Small                                                            | None                                                             | Small                                                            |                    |
| Monday          |                                   |          |        |                    | <input type="checkbox"/> None<br><input type="checkbox"/> Medium | <input type="checkbox"/> Small<br><input type="checkbox"/> Large | <input type="checkbox"/> None<br><input type="checkbox"/> Medium | <input type="checkbox"/> Small<br><input type="checkbox"/> Large | <input type="checkbox"/> None<br><input type="checkbox"/> Medium | <input type="checkbox"/> Small<br><input type="checkbox"/> Large |                    |
| Tuesday         |                                   |          |        |                    | <input type="checkbox"/> None<br><input type="checkbox"/> Medium | <input type="checkbox"/> Small<br><input type="checkbox"/> Large | <input type="checkbox"/> None<br><input type="checkbox"/> Medium | <input type="checkbox"/> Small<br><input type="checkbox"/> Large | <input type="checkbox"/> None<br><input type="checkbox"/> Medium | <input type="checkbox"/> Small<br><input type="checkbox"/> Large |                    |
| Wednesday       |                                   |          |        |                    | <input type="checkbox"/> None<br><input type="checkbox"/> Medium | <input type="checkbox"/> Small<br><input type="checkbox"/> Large | <input type="checkbox"/> None<br><input type="checkbox"/> Medium | <input type="checkbox"/> Small<br><input type="checkbox"/> Large | <input type="checkbox"/> None<br><input type="checkbox"/> Medium | <input type="checkbox"/> Small<br><input type="checkbox"/> Large |                    |
| Thursday        |                                   |          |        |                    | <input type="checkbox"/> None<br><input type="checkbox"/> Medium | <input type="checkbox"/> Small<br><input type="checkbox"/> Large | <input type="checkbox"/> None<br><input type="checkbox"/> Medium | <input type="checkbox"/> Small<br><input type="checkbox"/> Large | <input type="checkbox"/> None<br><input type="checkbox"/> Medium | <input type="checkbox"/> Small<br><input type="checkbox"/> Large |                    |
| Friday          |                                   |          |        |                    | <input type="checkbox"/> None<br><input type="checkbox"/> Medium | <input type="checkbox"/> Small<br><input type="checkbox"/> Large | <input type="checkbox"/> None<br><input type="checkbox"/> Medium | <input type="checkbox"/> Small<br><input type="checkbox"/> Large | <input type="checkbox"/> None<br><input type="checkbox"/> Medium | <input type="checkbox"/> Small<br><input type="checkbox"/> Large |                    |
| Saturday        |                                   |          |        |                    | <input type="checkbox"/> None<br><input type="checkbox"/> Medium | <input type="checkbox"/> Small<br><input type="checkbox"/> Large | <input type="checkbox"/> None<br><input type="checkbox"/> Medium | <input type="checkbox"/> Small<br><input type="checkbox"/> Large | <input type="checkbox"/> None<br><input type="checkbox"/> Medium | <input type="checkbox"/> Small<br><input type="checkbox"/> Large |                    |
| Sunday          |                                   |          |        |                    | <input type="checkbox"/> None<br><input type="checkbox"/> Medium | <input type="checkbox"/> Small<br><input type="checkbox"/> Large | <input type="checkbox"/> None<br><input type="checkbox"/> Medium | <input type="checkbox"/> Small<br><input type="checkbox"/> Large | <input type="checkbox"/> None<br><input type="checkbox"/> Medium | <input type="checkbox"/> Small<br><input type="checkbox"/> Large |                    |

\* Recorded from Pedometer (# is in Steps)

\*\*Enter number of additional meals. Leave blank if none.

## Supplemental Figure 2. Pictures of selected mailings to SFS participants

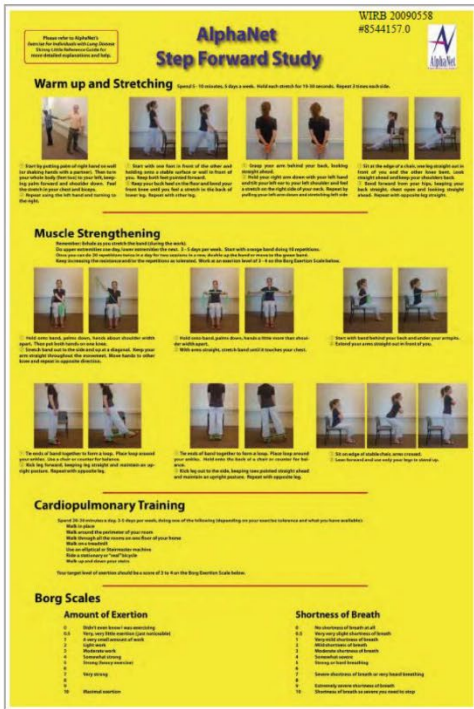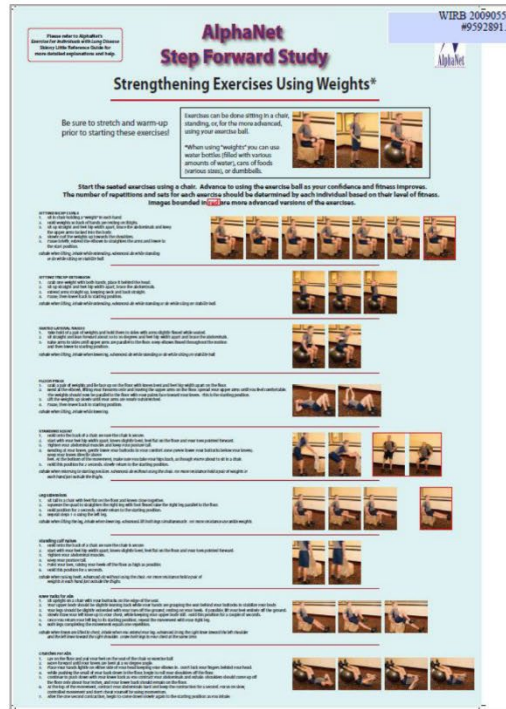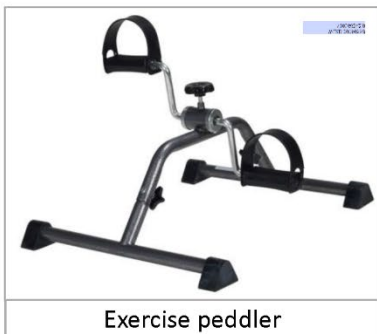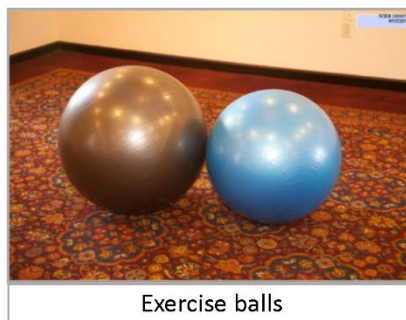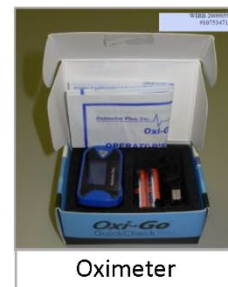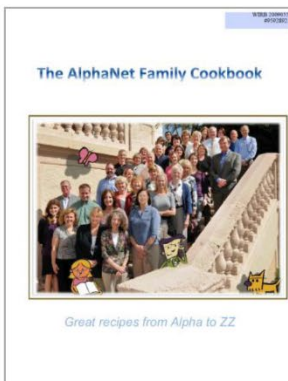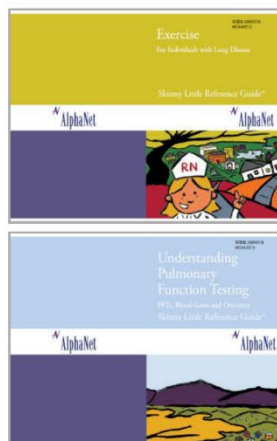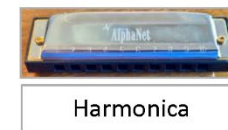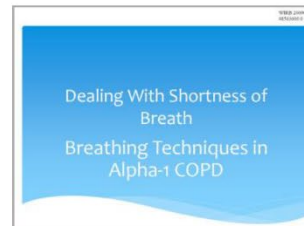

# Supplemental Figure 3. "Virtual Pulmonary Rehab" (continued)

The figure displays 12 virtual pulmonary rehab program session cards, arranged in a 4x3 grid. Each card is titled "Virtual Pulmonary Rehab Program" and includes a session title, a brief description, a list of information included, and a list of tools included. The sessions are:

- Session One: Here We Go!** Measuring Our Baseline and Laying the Groundwork. Information includes: Monitoring Oxygen Saturations, Fitness Assessments, Monitoring Exercise Intensity, and Optimal Times to Exercise. Tools include: RPE/RPD Scales, Fitness Assessment Score Card, and Movement Worksheet.
- Session Two: The Foundation:** Pursed lip breathing, Warm-ups & Cool-downs. Information includes: Pursed lip breathing (PILB), Warming Up, Cooling Down, and Flexibility. Tools include: Warm-up Routine, Cool-down Routine, and Home Exercise Programs.
- Session Three: Follow the Leader:** Resistance Training with Basic Moves. Information includes: Warming Up, Resistance Training (RT), and Cooling Down. Tools include: Warm-up Routine, Resistance Training (Strength) Routine, and Cool-down Routine.
- Session Four: Prescribing Movement as Medicine:** Exercise in Balanced, Effective Doses. Information includes: The Fitness Tripod, The FITT Prescription, Exercise Options, and Keeping Exercise Safe. Tools include: Home Exercise Programs.
- Session Five: Making Life a Moving Experience:** Activities of Daily Living (ADLs), Pacing, & Energy Conservation. Information includes: Activities of Daily Living, Recovery Breathing, Pacing & Energy Conservation, Posture Training, Bending & Lifting, and Coordinating PILB with Common ADLs. Tools include: Home Exercise Programs.
- Session Six: The Guiding Light of Pulse Oximeters:** Measuring and Maintaining Oxygen Saturations. Information includes: Oximeter, Oxygen Saturations (SpO<sub>2</sub>), Your Pulse Oximeter, Managing Abnormal PR/SpO<sub>2</sub>, and Oxygenation. Tools include: Oximeter, SpO<sub>2</sub>/PR - Log, and Home Exercise Program.
- Session Seven: Performance Enhancements:** Strategies for Managing Your Exercise Routine. Information includes: Managing an Exercise Routine, Exercise & Nutrition, Inhaled Medications, Resuming Exercise, Scheduling Exercise, Medications, and Home Exercise Programs. Tools include: Home Exercise Programs.
- Session Eight: Assessment and Planning:** Self-Management Strategies. Information includes: Symptoms, Infection Prevention, Defining the Problem, Contact the Doctor, Breathing Recovery DVD Demo, Tracking Tool, and Home Exercise. Tools include: Home Exercise.
- Session Nine: Fueling the Fire:** Healthy Diet and Managing Body Composition. Information includes: Eating for Energy, Exercise & Body Composition, Nutritional Challenges, ChooseMyPlate, and Home Exercise Programs. Tools include: Home Exercise Programs.
- Session Ten: Taking Charge:** Controlling Stress, Breathing and Exercise. Information includes: Stress, Managing Stress, Exercise, Energy for Favorite Activities, Coordinating Breathing with Daily Tasks, Worksheets, and Home Exercise Programs. Tools include: Home Exercise Programs.
- Session Eleven: Taking the Show on the Road:** Strategies for Leisure, Recreation and Travel. Information includes: General Guidelines, Considerations, MD Travel-Specific Appointment, The Journey, and Tracking Tools. Tools include: Home Exercise Programs.
- Session Twelve: Here We Are!** Measuring Our Progress, and Staying on Track. Information includes: Review: Fitness Assessments, Adherence Factors, Motivational Strategies, and Claiming Your Inner Champion. Tools include: RPE/RPD Scales, Fitness Assessment Score Card, and Movement Worksheet.
